# Supplementary material for: Development of a qPCR platform for quantification of the five bacteriophages within bacteriophage cocktail 2 (BFC2)
Source: PubMed Central journal article supplement (PMC6761158; doi:10.1038/s41598-019-50461-0), 2019-09-25
Supplement: 41598_2019_50461_MOESM1_ESM.pdf [file 41598_2019_50461_MOESM1_ESM.pdf]

## Supplementary information

Development of a qPCR platform for quantification of the five bacteriophages within bacteriophage cocktail 2 (BFC2)

Hans Duyvejonck<sup>1,2</sup>, Maya Merabishvili<sup>1,3,4</sup>, Jean-Paul Pirnay<sup>3</sup>, Daniel De Vos<sup>3</sup>, Gilbert Verbeken<sup>3</sup>, Jonas Van Belleghem<sup>1</sup>, Tessa Gryp<sup>1</sup>, Julie De Leenheer<sup>2</sup>, Kelly Van der Borght<sup>2</sup>, Leen Van Simaey<sup>1</sup>, Stefan Vermeulen<sup>2</sup>, Els Van Mechelen<sup>2</sup>, Mario Vaneechoutte<sup>1</sup>

<sup>1</sup> Laboratory Bacteriology Research (LBR), Department of Diagnostic Sciences, Faculty of Medicine and Health Sciences, University of Ghent, Corneel Heymanslaan 10, 9000 Ghent, Belgium, <sup>2</sup> Department of Biosciences, Faculty of Education, Health and Social Work, University College Ghent, Keramiekstraat 80, 9000 Ghent, Belgium, <sup>3</sup> Laboratory for Molecular and Cellular Technology (LabMCT), Burn Wound Center, Queen Astrid Military Hospital, Bruynstraat 1, 1120 Brussels, <sup>4</sup> The Eliava Institute of Bacteriophages, Microbiology and Virology, Gotua 3, Tbilisi 0160, Georgia

Supplementary Table S1. Overview of the in silico designed primer pairs for the five BFC2 phages.

| BFC2 phage | Primer | Sequence (5' → 3')        | Melting temperature (°C) | Amplicon length (bp) | Amplicon T <sub>m</sub> (°C) |
|------------|--------|---------------------------|--------------------------|----------------------|------------------------------|
| Acibel004  | 1      | F GGCTGAACGTGTTTCGTCAAC   | 60.0                     | 133                  | 80.88                        |
|            |        | R CACCGAAGCGTGGGAAGTA     | 59.7                     |                      |                              |
|            | 2      | F ATGGCTGAACGTGTTTCGTCAAC | 61.9                     | 135                  |                              |
|            |        | R CACCGAAGCGTGGGAAGTA     | 59.7                     |                      |                              |
|            | 3 *    | F GTATCGTCGGCTGTCGTGAA    | 60.2                     | 113                  |                              |
|            |        | R CGATCCTTCGTGGCGATCAT    | 59.9                     |                      |                              |
|            | 4      | F GGCTGTCGTGAAAACGATA     | 55.7                     | 101                  |                              |
|            |        | R CCTTCGTGGCGATCATAA D12  | 54.5                     |                      |                              |
| Acibel007  | 1 *    | F TGTCGCTGAACATGGCGATA    | 59.5                     | 132                  | 83.46                        |
|            |        | R TCGTTAGCACGGTCAAGCA     | 59.6                     |                      |                              |
|            | 2      | F GCTGAACATGGCGATACAA     | 56.0                     | 125                  |                              |
|            |        | R TTAGCACGGTCAAGCATAC     | 55.3                     |                      |                              |
| 14/1       | 1      | F AGCCAGAGCGACGATATCAC    | 59.7                     | 108                  | 84.33                        |
|            |        | R TTCGATTCCGCCATCACCAA    | 60.0                     |                      |                              |
|            | 2      | F GCGACGATATCACCATCCAA    | 57.9                     | 95                   |                              |
|            |        | R TCCGCCATCACCAATACTCG    | 59.9                     |                      |                              |
|            | 3 *    | F AGCGATGGGTATCGGCAAAG    | 60.5                     | 114                  |                              |
|            |        | R TGGGCATTACCGAGGTTGAC    | 60.0                     |                      |                              |
|            | 4      | F AATAGCGATGGGTATCGGCA    | 59.0                     | 114                  |                              |
|            |        | R CCTGGGCATTACCGAGGTTG    | 60.8                     |                      |                              |
|            | 5      | F TCGTTCAACGGCAAGTCGTA    | 60.0                     | 130                  |                              |
|            |        | R AGCTCGACAAGCCAGATTCA    | 59.4                     |                      |                              |
|            | 6      | F TCAACGGCAAGTCGTACAGC    | 60.9                     | 128                  |                              |
|            |        | R GCAGCTCGACAAGCCAGATT    | 61.0                     |                      |                              |
|            | 7      | F GGAATCCGCATCCAGTGCTA    | 59.9                     | 100                  |                              |
|            |        | R CCCACTCGACGAACTTGACA    | 60.0                     |                      |                              |
|            | 8      | F TCCGCATCCAGTGCTATACC    | 59.3                     | 92                   |                              |
|            |        | R CTCGACGAACTTGACAAACG    | 57.5                     |                      |                              |
| PNM        | 1 *    | F GCGGACCGGAATAACAAGA     | 60.1                     | 75                   | 85.34                        |
|            |        | R CCGACCTCGACCAGTTGTG     | 60.4                     |                      |                              |
|            | 2      | F AAGCTGGCGGACCGGAATAA    | 61.9                     | 68                   |                              |
|            |        | R AGTTGTGCCAAGCCCTGCT     | 62.4                     |                      |                              |
| ISP        | 1      | F GGATGGGGAACGCAATACCA    | 60.1                     | 128                  |                              |
|            |        | R TCACTGCCACCCATTTGAGTA   | 59.3                     |                      |                              |
|            | 2      | F GGAACGCAATACCAAGGTCTTG  | 59.8                     | 121                  |                              |
|            |        | R ACTGCCACCCATTTGAGTAGC   | 60.6                     |                      |                              |
|            | 3      | F GGGAACGCAATACCAAGGTCTTG | 64.6                     | 122                  |                              |
|            |        | R CACTGCCACCCATTTGAGTAGCT | 64.6                     |                      |                              |
|            | 4      | F AGCAGGTGGAAGTGGCATAG    | 59.8                     | 147                  |                              |
|            |        | R CCTATTCTCCGCCGATAGC     | 59.8                     |                      |                              |

|     |   |                          |      |     |       |
|-----|---|--------------------------|------|-----|-------|
| 5   | F | GGTGGAAGTGGCATAGGGAAA    | 60.0 | 138 |       |
|     | R | TCCTCCGCCGATAGCTTTAC     | 59.3 |     |       |
| 6 * | F | CCGGCTTGACTCTCATTCCA     | 59.8 | 81  | 75.98 |
|     | R | AGTACAACCGAGCAGTTAGA     | 58.8 |     |       |
| 7   | F | CTGTACCGGCTTGACTCTCA     | 59.1 | 94  |       |
|     | R | CTTGAAAAAGCTACAACCGAGCAG | 60.9 |     |       |

---

\*: Specific and efficient primer pair selected for further investigation; NA: Not applicable.

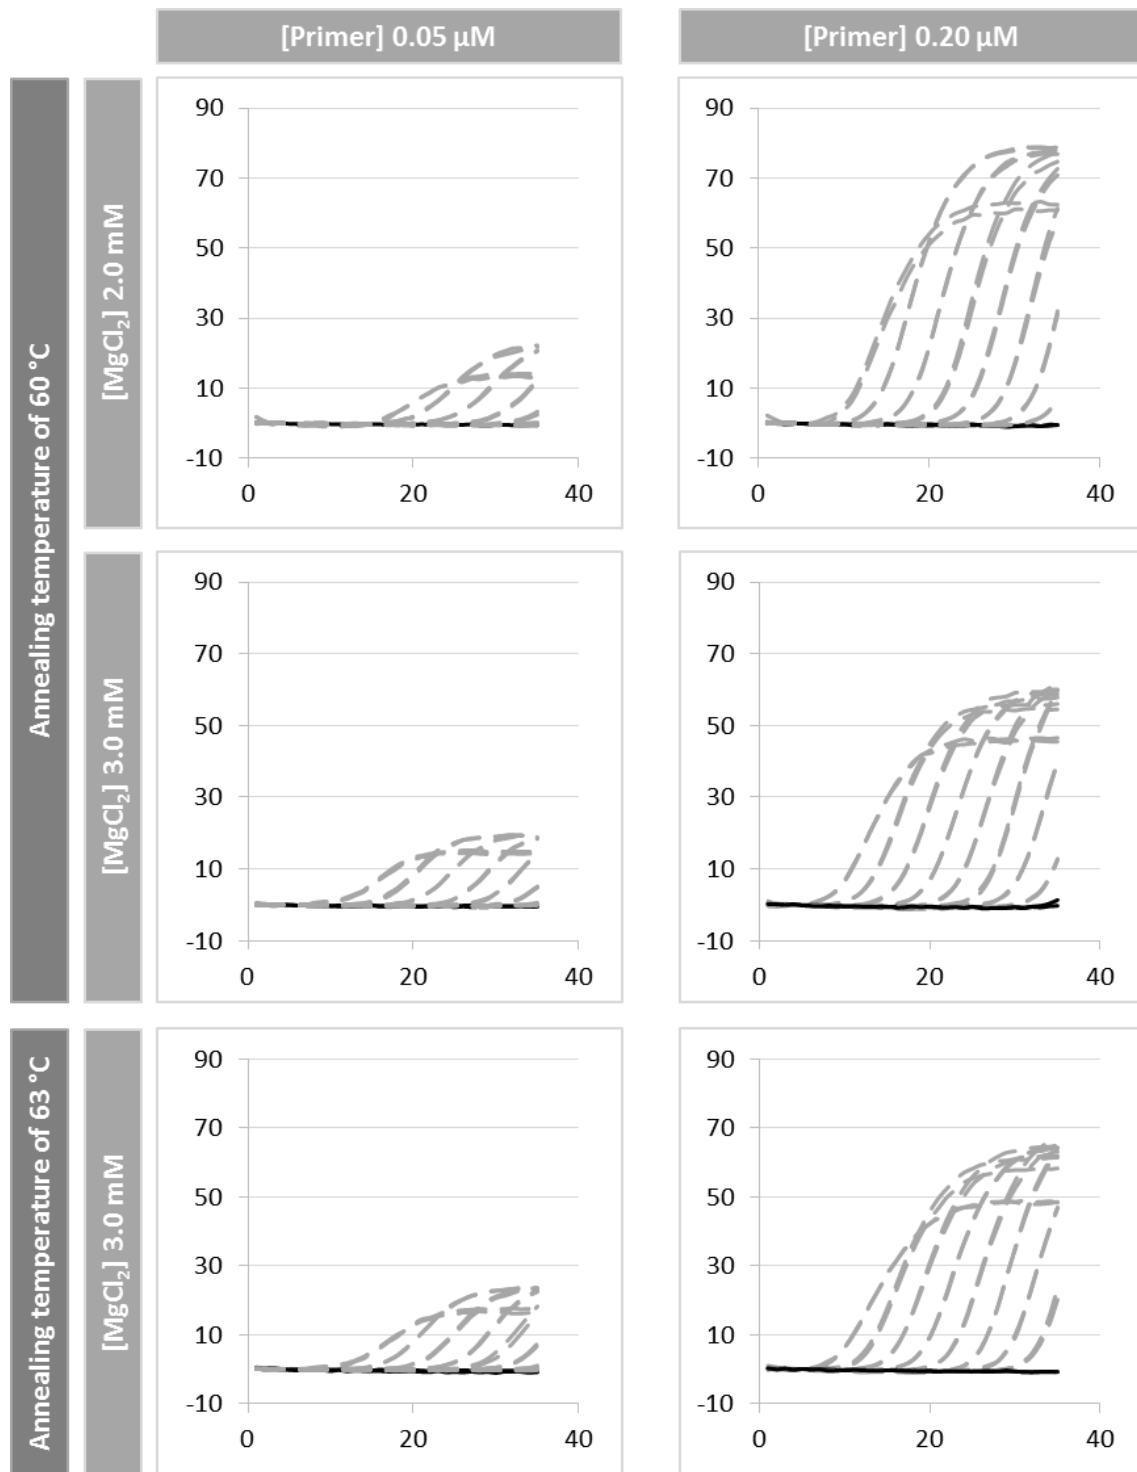

**Supplementary Fig. S1. Influence of different annealing temperatures (60, 63 °C), MgCl<sub>2</sub> concentrations (2 and 3 mM) and primer concentrations (0.05 and 0.2 μM) on the efficiency of *in silico* designed primer pairs.** Results for primer pair 1 of phage PNM are used for this graphic evaluation. The amplification curves of the ten-fold dilution series of the PNM phage (dotted curves), and water as a negative control (solid line), are being displayed.

X-axis: Cq values; Y-axis: Fluorescence intensity at 465-510 nm.

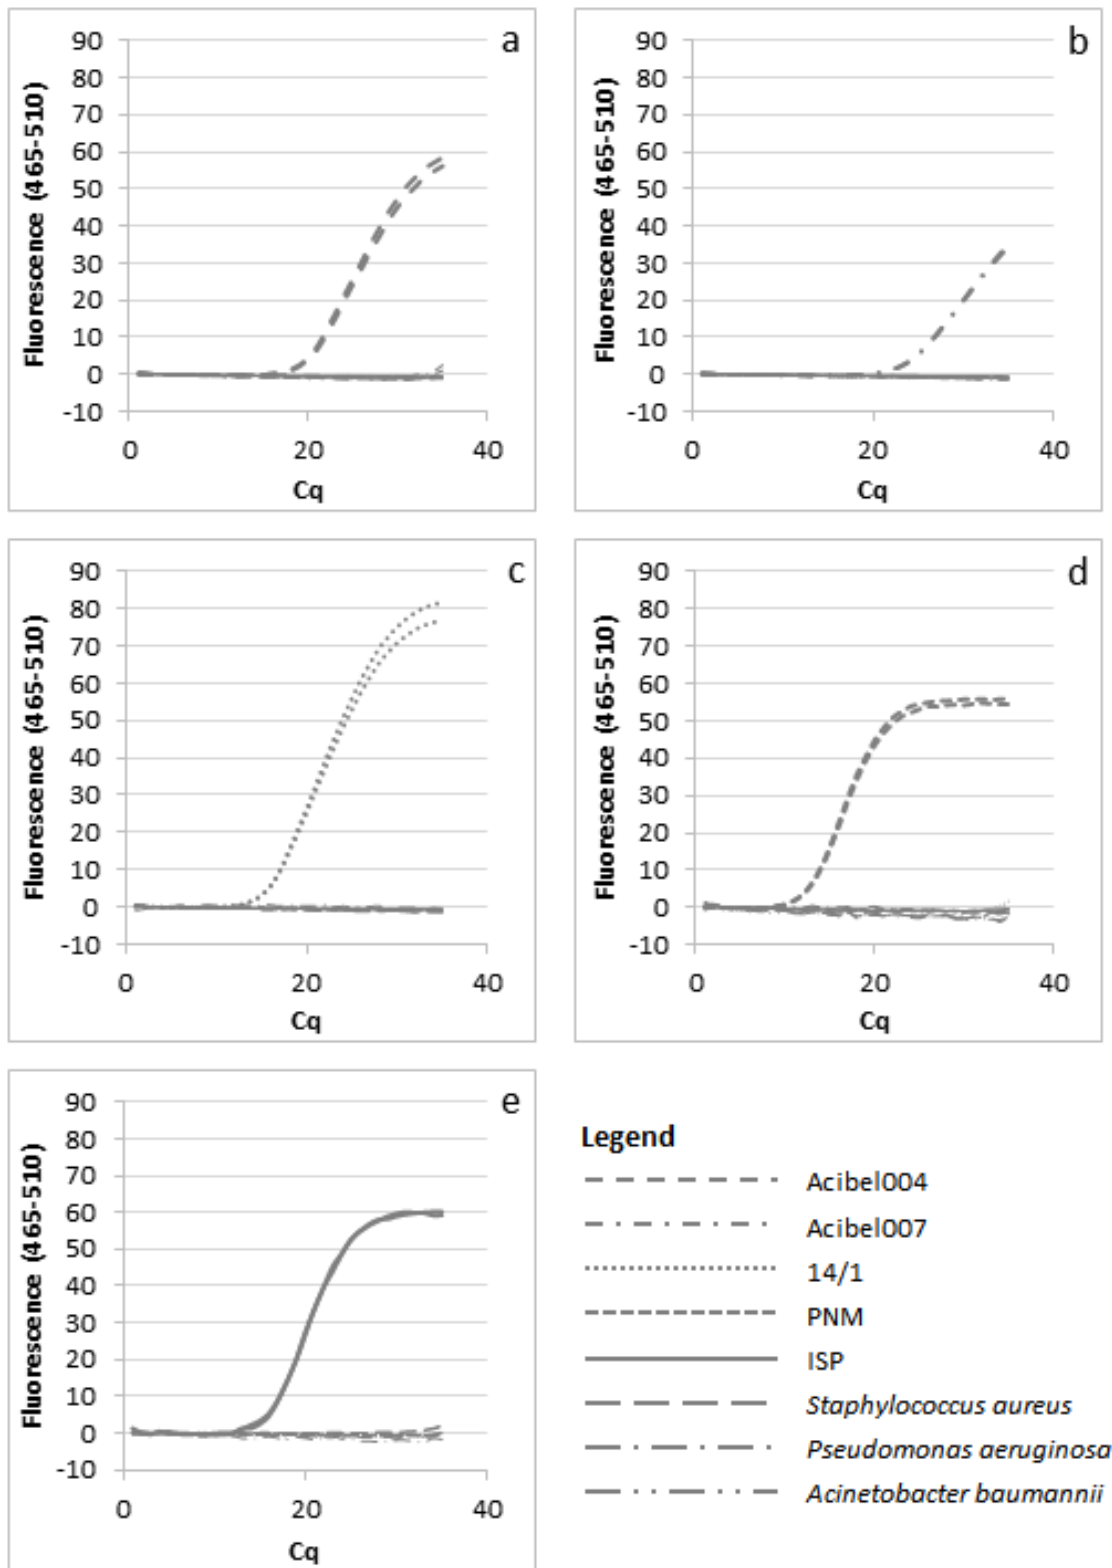

Supplementary Fig. S2. Evaluation of absence of cross reactivity for the primer pairs that were selected for each of the five phages. Primer pairs specific for Acibel004 phage (a), Acibel007 phage (b), 14/1 phage (c), PNM phage (d) and ISP phage (e) were tested against all five phages and the three bacterial hosts.

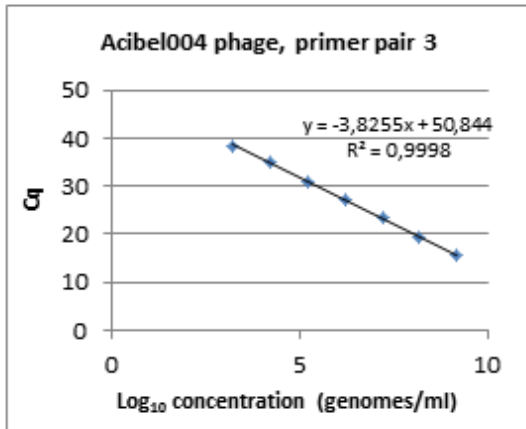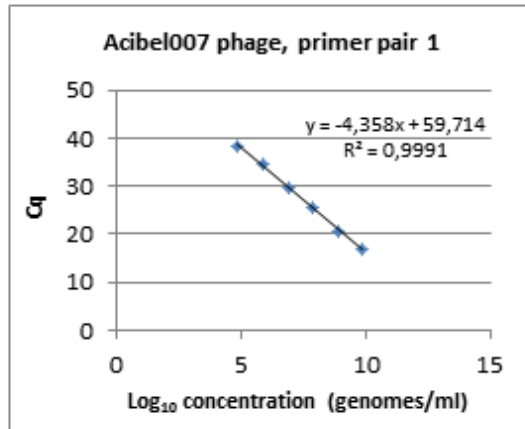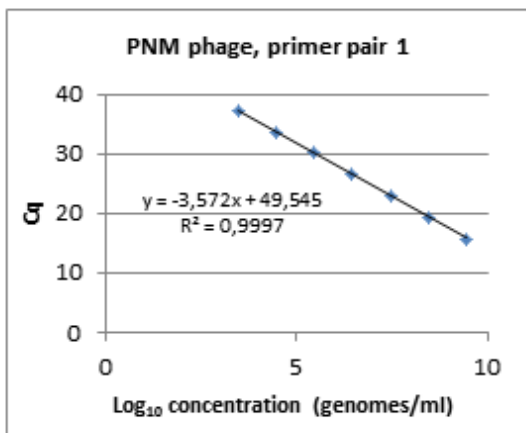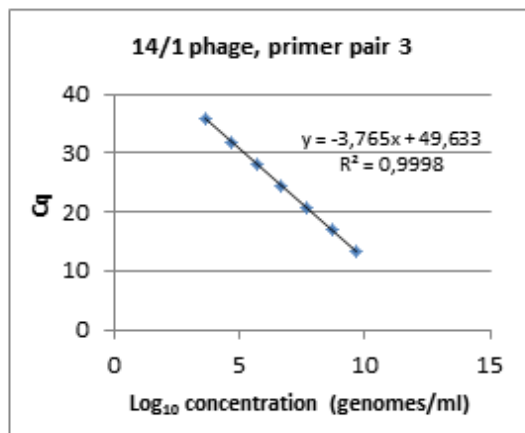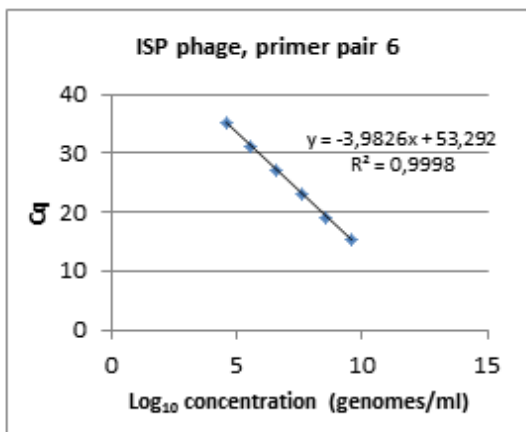

Supplementary Fig. S3. Calibration curves of all five phages.
